# Supplementary material
Source: publisher figshare collection journal article supplement (https://sage.figshare.com/ndownloader/files/15473105)
Supplement: Supplementary file 1 [file 15473105]

## Sheet: Supplementary_Table_S3
Supplementary Table 3: Pathway analysis of genes reaching an adjusted p-value of 0.1 in the differential expression analysis
© 2000-2019 QIAGEN. All rights reserved.
Ingenuity Canonical Pathways	-log(p-value)	Benjamini-Hochberg corrected p-value	Ratio	Molecules
Glutamate Receptor Signaling	3.13	0.0562341	0.0526	CAMK4,SLC38A1
Nur77 Signaling in T Lymphocytes	2.87	0.0562341	0.0392	CAMK4,MAP3K2
Chemokine Signaling	2.65	0.0630957	0.0303	CAMK4,LIMK2
RhoA Signaling	2.35	0.0758578	0.0213	RAPGEF6,LIMK2
RANK Signaling in Osteoclasts	2.34	0.0758578	0.0211	CAMK4,MAP3K2
CCR3 Signaling in Eosinophils	2.24	0.0812831	0.0187	CAMK4,LIMK2
Cardiac Hypertrophy Signaling (Enhanced)	2.04	0.105925	0.00726	CAMK4,PDK1,MAP3K2
GNRH Signaling	1.99	0.105925	0.0139	CAMK4,MAP3K2
Germ Cell-Sertoli Cell Junction Signaling	1.95	0.105925	0.0132	LIMK2,MAP3K2
B Cell Receptor Signaling	1.83	0.118032	0.0114	CAMK4,MAP3K2
Breast Cancer Regulation by Stathmin1	1.81	0.118032	0.0112	CAMK4,LIMK2
Opioid Signaling Pathway	1.72	0.13213	0.0101	CAMK4,PDK1
Cardiac Hypertrophy Signaling	1.69	0.13213	0.00962	CAMK4,MAP3K2
Xenobiotic Metabolism Signaling	1.63	0.139959	0.00897	CAMK4,MAP3K2
nNOS Signaling in Skeletal Muscle Cells	1.48	0.177828	0.0323	CAMK4
Notch Signaling	1.47	0.177828	0.0312	FURIN
nNOS Signaling in Neurons	1.37	0.196789	0.025	CAMK4
iNOS Signaling	1.33	0.196789	0.0227	CAMK4
Cancer Drug Resistance By Drug Efflux	1.32	0.196789	0.0217	PDK1
Semaphorin Signaling in Neurons	1.3	0.196789	0.0208	LIMK2
CD27 Signaling in Lymphocytes	1.26	0.196789	0.0192	MAP3K2
Calcium-induced T Lymphocyte Apoptosis	1.22	0.196789	0.0175	CAMK4
Pyridoxal 5'-phosphate Salvage Pathway	1.22	0.196789	0.0172	LIMK2
Caveolar-mediated Endocytosis Signaling	1.21	0.196789	0.0169	MAP3K2
Melatonin Signaling	1.18	0.196789	0.0156	CAMK4
ERK5 Signaling	1.16	0.196789	0.0152	MAP3K2
CCR5 Signaling in Macrophages	1.1	0.196789	0.0132	CAMK4
BMP signaling pathway	1.1	0.196789	0.0132	CAMK4
α-Adrenergic Signaling	1.08	0.196789	0.0123	CAMK4
Salvage Pathways of Pyrimidine Ribonucleotides	1.07	0.196789	0.0122	LIMK2
TR/RXR Activation	1.07	0.196789	0.012	CAMK4
Regulation of IL-2 Expression in Activated and Anergic T Lymphocytes	1.05	0.196789	0.0115	CAMK4
PAK Signaling	1.04	0.196789	0.0114	LIMK2
Neuropathic Pain Signaling In Dorsal Horn Neurons	1.02	0.196789	0.0109	CAMK4
GP6 Signaling Pathway	1.02	0.196789	0.0109	CAMK4
Cellular Effects of Sildenafil (Viagra)	1.01	0.196789	0.0105	CAMK4
Nitric Oxide Signaling in the Cardiovascular System	1.01	0.196789	0.0105	CAMK4
SAPK/JNK Signaling	0.996	0.196789	0.0101	MAP3K2
Synaptic Long Term Potentiation	0.967	0.196789	0.00943	CAMK4
T Cell Receptor Signaling	0.955	0.196789	0.00917	CAMK4
iCOS-iCOSL Signaling in T Helper Cells	0.951	0.196789	0.00909	CAMK4
Glioma Signaling	0.951	0.196789	0.00909	CAMK4
Rac Signaling	0.951	0.196789	0.00909	LIMK2
Role of Tissue Factor in Cancer	0.947	0.196789	0.00901	LIMK2
HGF Signaling	0.943	0.196789	0.00893	MAP3K2
fMLP Signaling in Neutrophils	0.939	0.196789	0.00885	CAMK4
Androgen Signaling	0.936	0.196789	0.00877	CAMK4
NGF Signaling	0.936	0.196789	0.00877	MAP3K2
Apelin Endothelial Signaling Pathway	0.928	0.196789	0.00862	CAMK4
Corticotropin Releasing Hormone Signaling	0.924	0.196789	0.00855	CAMK4
Cdc42 Signaling	0.921	0.196789	0.00847	LIMK2
CD28 Signaling in T Helper Cells	0.91	0.198153	0.00826	CAMK4
PI3K Signaling in B Lymphocytes	0.9	0.199067	0.00806	CAMK4
RhoGDI Signaling	0.866	0.201837	0.00741	LIMK2
eNOS Signaling	0.866	0.201837	0.00741	CAMK4
Dopamine-DARPP32 Feedback in cAMP Signaling	0.863	0.201837	0.00735	CAMK4
PKCθ Signaling in T Lymphocytes	0.845	0.201837	0.00699	MAP3K2
Gαq Signaling	0.842	0.201837	0.00694	CAMK4
Calcium Signaling	0.842	0.201837	0.00694	CAMK4
Mitochondrial Dysfunction	0.833	0.201837	0.0068	FURIN
Ephrin Receptor Signaling	0.83	0.201837	0.00676	LIMK2
Sertoli Cell-Sertoli Cell Junction Signaling	0.818	0.201837	0.00658	MAP3K2
T Cell Exhaustion Signaling Pathway	0.807	0.201837	0.00637	PDK1
Sperm Motility	0.79	0.201837	0.00613	CAMK4
Role of NFAT in Regulation of the Immune Response	0.783	0.201837	0.00602	CAMK4
Gap Junction Signaling	0.78	0.201837	0.00599	MAP3K2
Production of Nitric Oxide and Reactive Oxygen Species in Macrophages	0.775	0.201837	0.00588	MAP3K2
Systemic Lupus Erythematosus Signaling	0.772	0.201837	0.00585	CAMK4
Thrombin Signaling	0.767	0.201837	0.00578	CAMK4
Adrenomedullin signaling pathway	0.767	0.201837	0.00578	CAMK4
CREB Signaling in Neurons	0.764	0.201837	0.00575	CAMK4
cAMP-mediated signaling	0.762	0.201837	0.00571	CAMK4
IL-8 Signaling	0.752	0.201837	0.00556	LIMK2
Actin Cytoskeleton Signaling	0.75	0.201837	0.00552	LIMK2
Role of NFAT in Cardiac Hypertrophy	0.735	0.206063	0.00535	CAMK4
Role of Osteoblasts, Osteoclasts and Chondrocytes in Rheumatoid Arthritis	0.726	0.20797	0.00521	CAMK4
Phospholipase C Signaling	0.719	0.20797	0.00513	CAMK4
Signaling by Rho Family GTPases	0.712	0.20893	0.00503	LIMK2
G-Protein Coupled Receptor Signaling	0.662	0.231206	0.00442	CAMK4
Sirtuin Signaling Pathway	0.627	0.244906	0.00403	PDK1
Synaptogenesis Signaling Pathway	0.627	0.244906	0.00403	CAMK4
Role of Macrophages, Fibroblasts and Endothelial Cells in Rheumatoid Arthritis	0.607	0.25293	0.00383	CAMK4
Protein Kinase A Signaling	0.533	0.295801	0.00314	CAMK4
Axonal Guidance Signaling	0.476	0.334195	0.00269	LIMK2
